# Supplementary material for: In Vitro Antibody-Dependent Enhancement of SARS-CoV-2 Infection Could Be Abolished by Adding Human IgG
Source: MDPI journal article supplement (doi:10.3390/pathogens12091108), 2023-08-30
Supplement: s1 [file s1]

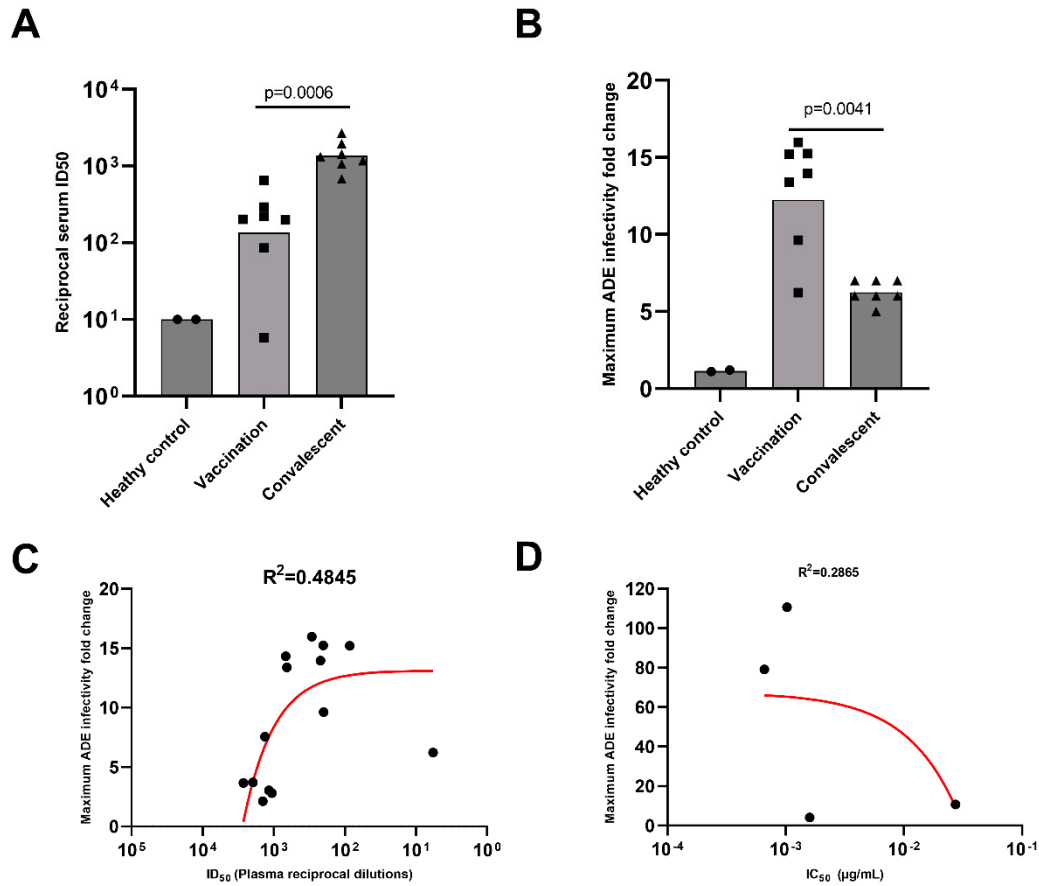

**Supplementary Figure S1.** Correlation of the maximum ADE infectivity fold change at which the maximum viral entry with the antibody neutralization ID<sub>50</sub>. **(A)** SARS-CoV-2 D614G neutralization titers of sera from convalescent individuals versus those after 3 doses of inactivated vaccinations. **(B)** Maximum ADE infectivity fold change of sera from convalescent individuals versus those after 3 doses of inactivated vaccinations. **(C)** Correlation of the maximum ADE infectivity fold change at which the maximum viral entry and the serum neutralization ID<sub>50</sub> for SARS-CoV-2 D614G virus. **(D)** Correlation of the maximum ADE infectivity fold change at which the maximum viral entry with mAbs neutralization IC<sub>50</sub> for SARS-CoV-2 D614G virus. A linear regression model was used for correlation analysis.

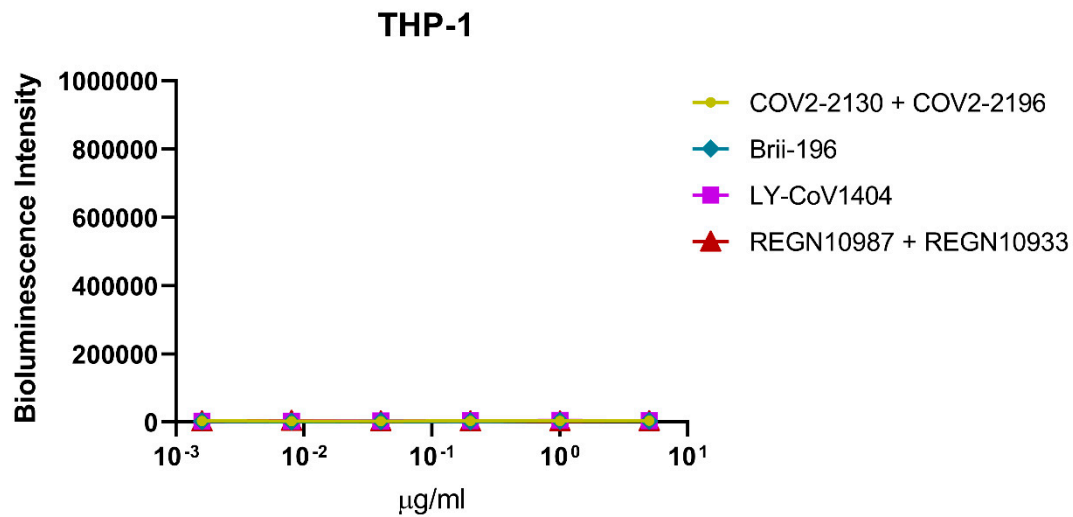

**Supplementary Figure S2.** No ADE of SARS-CoV-2 infection by mAbs was observed on THP-1 cells.

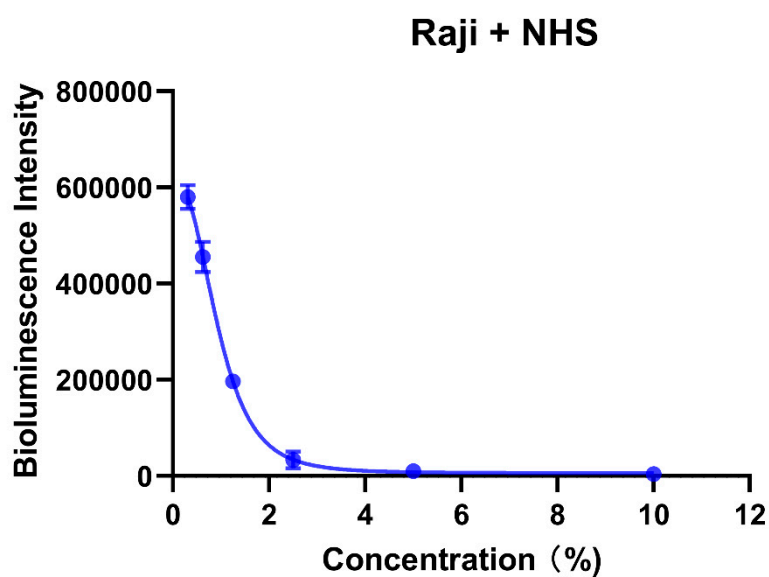

**Supplementary Figure S3.** Determination of the optimal NHS concentration in cell culture medium that is sufficient to eliminate LY-CoV1404 (1μg/ml) induced ADE activity on Raji cells.
